# Supplementary material
Source: PubMed Central journal article supplement (PMC3119066)
Supplement: NIHMS294296-supplement-01.pdf [file NIHMS294296-supplement-01.pdf]

*Supp. Table 1. Sequences of oligonucleotides used in this study.*

| Name   | Description | Sequence                                                                                     |
|--------|-------------|----------------------------------------------------------------------------------------------|
| OLH3   | ssDNA       | TTGATAAGAGGTCATTTGAATTCATGGCTTAGAGCTTAAT<br>TGCTGAATCTGGTGCTGGGATCCAACATGTTTTAAATATG         |
| OLH3-c | dsDNA       | CATATTTAAAACATGTTGGATCCCAGCACCAGATTCAGCA<br>ATTAAGCTCTAAGCCATGAATTCAAATGACCTCTTATCAA         |
| OLH1   | Overhang    | ATTAAGCTCTAAGCCATGAATTCAAATGACCTCTTATCAA                                                     |
| OLH5   | fork        | CATATTTAAAACATGTTGGATCCCAGCACCAGATTCAGCA<br>TACGTTACCGATCGTACGTTTCGATGCTGGCTACTGCTAGC        |
| OL83   | ssDNA       | AAATGAACATAAAGTAAATAAGTATAAGGATAATACAAA<br>ATAAGTAAATGAATAAACATAGAAAATAAAGTAAAGGAT<br>ATAAAA |
| OL83-c | ssDNA       | TTTATATCCTTTACTTTATTTTCTATGTTTATTCATTTACTT<br>ATTTTGTATTATCCTTATACTTATTTACTTTATGTTTCATTT     |
