# Supplementary material
Source: PubMed Central journal article supplement (PMC3119066)
Supplement: NIHMS294296-supplement-03.pdf [file NIHMS294296-supplement-03.pdf]

**A.**

```

scMei5 -----MHNQEEWLDKDKTLVNEEEN-----TCINHSYTKKDTNNYRVGKSGIK 43
mSfr1 MAEEGNQEFSTKMESSDSASTSPDAPQSENPPSPPTSPAAPQSENPPSPPTSPAAPQ
      *. * . : . . . . : . ** * . . * . : . . . . :
scMei5 DLKKPTN--QKEIAIKNRE-----LTKQLTLLRQEN----NHLOQACKILSENKIIENRK 92
mSfr1 PRENPPSPPTSPAAPQPRENPPSPPTSPAAPQPRENPPSPHSNSGKQPLSGTPKERLKK 120
      : : * . . * : ** * . : : ** : . . : ** . . : *
scMei5 SIEKWR TICEMELSFILN-----STLIKINRMGGYKDFLEKEMEAKRRLEYQIDNGMED 147
mSfr1 ARSSSHSFCVVKRMKVENDENNETLSEPGESKEENCSCAQESLKNKDEPGEKSSEK 180
      : . . : : * . : : : : ** : . . . : : : . * : * . . . * .
scMei5 QICEIKESDD-----FRQLSEVEKQEWESQMNEQLKELEKKKIAELEKLN- 192
mSfr1 NTCEKSSDTGSSNALPKESENAIIREKLQEKIRLIRQVEEKEDLLRRLKLVKMYRIKN 240
      : * * * . ** : : : * * . * : : * . * : : * : : : :
scMei5 -----KVLHDSEGKDFGMAELCTRLKLDYSLIFPQ----- 222
mSfr1 DVTELENLIKWRKCGQRLCELQSIMSEDEDEKLTTELIDFYGIDNLLHYNRSEEF 300
      . : : * . : : : : * * : * * . : :
scMei5 ---
mSfr1 TGV 303

```

**B.**

```

scMei5 -----MHNQEEWLDKDKTLVNEEENTCINHS-----YTK 29
spSfr1 MSQTINSELNENATSQCKEDLKVLSLSEDLRDSQGQLGIENPPKCNNSGNHSNLDLGFIEQ 60
      . : : * . : * * : * * . :
scMei5 KDTNNYRVGKSGIKDLKKPTNQKEIAIKN-----RELTQQLTLLRQENNHLOQACKILSE 84
spSfr1 SETVHPENEKALTPDLRDTKIHTSLPITTFPSKKRAREAKNILLKPFKSPLRQTASPOVA 120
      . : * : . * : * : . . . . . * : * : . . * : : .
scMei5 NKIIENRKSIEKWR---TICEMELSFILNSTLIKINR-----MGGYKDFLEK 128
spSfr1 DTNLKPSLAVTNLNSDETNTSSEPVTSPLRTPPNSIKRQKRLFKSPI SNCLNPKSDPEIT 180
      : . : : : : . . . : : * : * * . * : * . * .
scMei5 EMEAKRRLEYQIDNGMEDQICEIKESDDFRQLSEVE----KQEWESQMNEQLKELEK- 182
spSfr1 QLLSRRLKLEKEVRN-LQEQLITAE TARKVEAKNEDKDLQTLIQKWKNAQQAAEVLFKP 239
      : : : : * * : * : : : : . . . * : * : * . : : * *
scMei5 --KKIAELEKLNKVLHDSEGK-----DFGMAELCTRLKLDYSLIFPQ----- 222
spSfr1 MAERIRLAGGVTSQFRIE EGENKQIQEVRTFTMSMFLNQFGVPHLMSFDEENGDWKS 299
      : * : : : * * : * * : : : : * : :

```
