# Supplementary material
Source: PubMed Central journal article supplement (PMC3119066)
Supplement: NIHMS294296-supplement-04.pdf [file NIHMS294296-supplement-04.pdf]

**A.**

```

scSae3      -----MNYLETQLNKK-----QKQIQEYESMNGN-----LIKMFQLSKEKK--N 38
mSwi5      MGSRGGTALTWGESEFSRLYHGGYRSPQRPFPMIDENNDVSEALSSDIKKLKEKHDMLD 60
           :.: *:::..:      :. : : :. *      * . :::*:::..: :

scSae3      DETPKKISSTY-----IKELKEYNELRDAGLRLAQIIADEKQCKIKDVFEEIGYSMK 90
mSwi5      KEISQLIAEGYRVIELEKHISLLHEYNDIKDVSQMLLGLAVTRGVTTKELYPDFDLNLN 120
           .* .: *:. *      *. *::*:::.*.. *      :* : . *::: :. :.:

scSae3      D 91
mSwi5      D 121
           *
    
```

**B.**

```

scSae3      MNYLETQLNKKQKQIQEY-ESMNGNLIKMFQLSKEKKNDETPKKISSTYIKELKEYNEL 59
spSwi5      ME--KSQLESRVHLLLEQQKEQLSSLQDALAKL-----NRDAKQTVQKHIDLLHTYNEI 53
           *: :::*:.: : :.: *:::..* . : :*.      :. .*: ..*.. *: :*:

scSae3      RDAGLRLAQIIADEKQCKIKDVFEEIGYSMKD 91
spSwi5      RDIALGMIGKVAEHEKCTSVELFDRFGVNGSE 85
           ** .* : :*:::..* . : :*:::..* . .:
    
```
