# Supplementary material
Source: PubMed Central journal article supplement (PMC3119066)

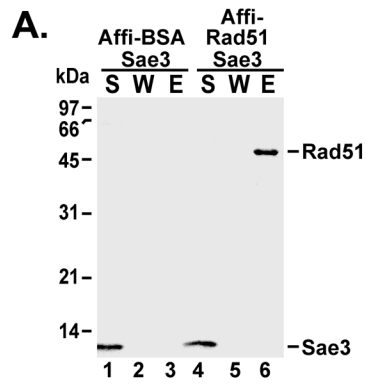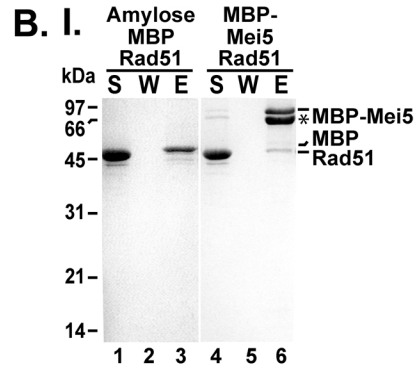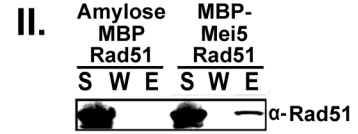

Supplement: NIHMS294296-supplement-02.pdf [file NIHMS294296-supplement-02.pdf]
